# Supplementary material for: (-)-Epigallocatechin-3-Gallate Prevents IL-1β-Induced uPAR Expression and Invasiveness via the Suppression of NF-κB and AP-1 in Human Bladder Cancer Cells
Source: MDPI journal article supplement (doi:10.3390/ijms232214008), 2022-11-13
Supplement: s1 [file s1]

## Supplementary data and information

### *Article*

#### **(-)-Epigallocatechin-3-Gallate Prevents IL-1 $\beta$ -Induced uPAR Expression and Invasiveness via the Suppression of NF- $\kappa$ B and AP-1 in Human Bladder Cancer Cells**

Dhiraj Kumar Sah 1, Pham Ngoc Khoi 2, Shinan Li 1, Archana Arjunan 1, Jae-Uk Jeong 3 and Young Do Jung 1,\*

1 Department of Biochemistry, Chonnam National University Medical School, Hwasun 58128, Korea

2 Faculty of Basic Medical Sciences, Pham Ngoc Thach University of Medicine, Ho Chi Minh City 740500, Vietnam

3 Department of Radiation Oncology, Chonnam National University Medical School, Hwasun 58128, Korea

\* Correspondence: ydjung@chonnam.ac.kr

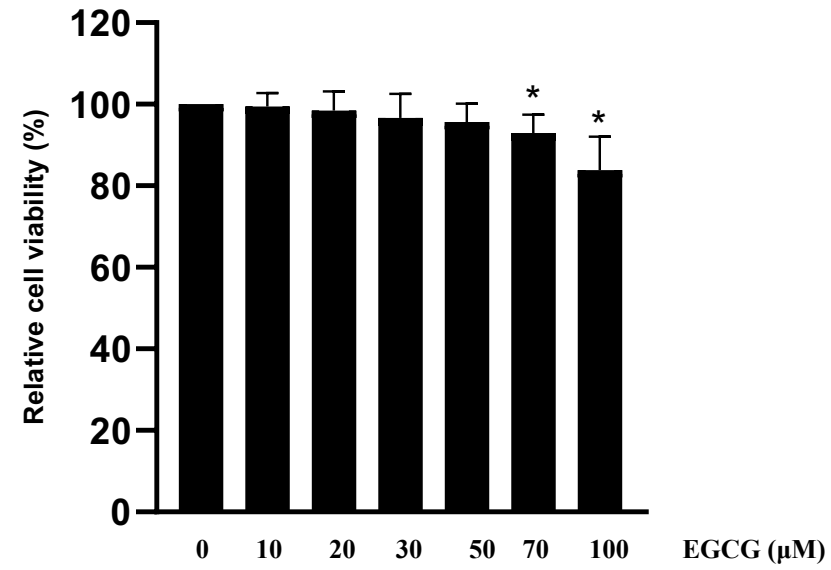

Supplementary Figure S1. EGCG MTT assay. T24 cells were incubated with 10-100 μM EGCG for 24 hours, and their viabilities were examined by performing the MTT assay. The above data represent the mean  $\pm$  SD from triplicate measurements. \*  $p < 0.05$ , versus control

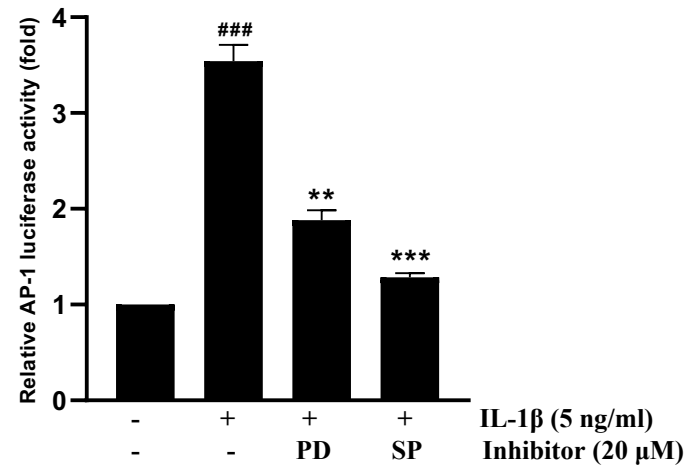

Supplementary Figure S2. Efficiency of specific chemical inhibitors of ERK1/2 (PD) and JNK (SP) signaling. T24 cells were pretreated with PD and SP for 1 hour and then were transiently transfected with the AP-1 luciferase reporter plasmid and were incubated with IL-1 $\beta$ , the cells were lysed, and luciferase activity was determined. The above data represent the mean  $\pm$  SD from triplicate measurements. (#  $P < 0.05$ , ##  $P < 0.01$ , ###  $P < 0.001$ , ####  $P < 0.0001$  versus control; \*  $p < 0.05$ , \*\*  $P < 0.01$ , \*\*\*  $P < 0.001$ , \*\*\*\*  $P < 0.0001$  versus IL-1 $\beta$  ).

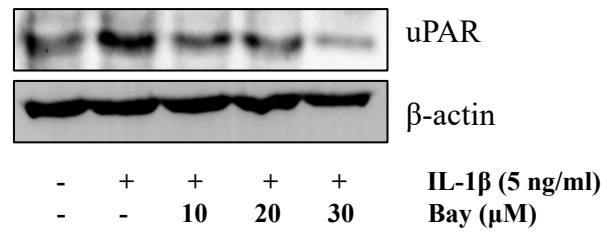

Supplementary Figure S3. T24 cells were pretreated with different concentration of Bay (10-30 $\mu$ M) for 1 hr. The cells were then incubated with IL-1 $\beta$  for 4 hr and uPAR protein level was evaluated by western blotting.

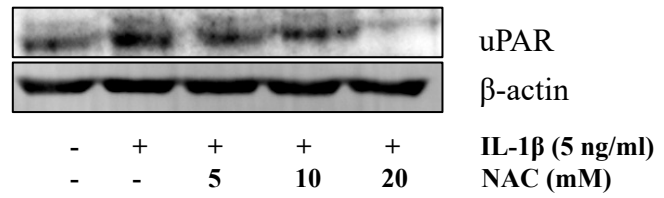

Supplementary Figure S4. T24 cells were pretreated with different concentration of NAC (5-20 $\mu$ M) for 1 hr. The cells were then incubated with IL-1 $\beta$  for 4 hr and uPAR protein level was evaluated by western blotting.
